# Supplementary material for: Decision Support Models for Site Remediation: An Evaluation of Industry Practice in China
Source: MDPI journal article supplement (doi:10.3390/su141911811), 2022-09-20
Supplement: s1 [file s1]

Archive with 1 entries (1 files):
- sustainability-1860104-supplementary.pdf
