# Supplementary material for: Decision Support Models for Site Remediation: An Evaluation of Industry Practice in China
Source: MDPI journal article supplement (doi:10.3390/su141911811), 2022-09-20
Supplement: s1 [file s1 › sustainability-1860104-supplementary.pdf]

# Decision support models for site remediation: an evaluation of industry practice in China

Na Song <sup>1</sup>, Andrew Hursthouse <sup>1,2,\*</sup>, Iain Mclellan <sup>1</sup> and Zhenghua Wang <sup>2</sup>

## SUPPLEMENTARY DATA

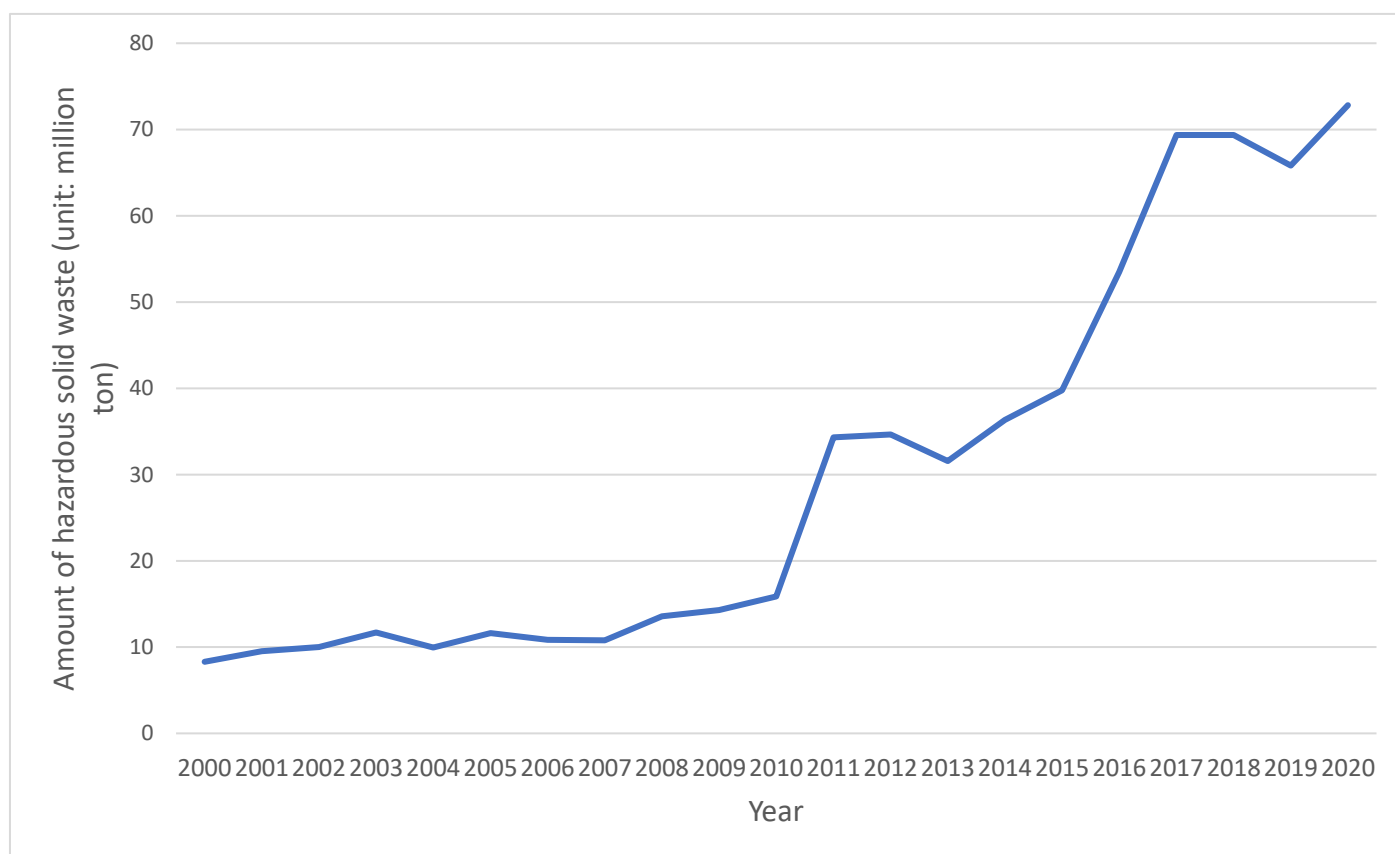

**Figure S1.** Amount of hazardous solid waste generated in the PRC in 2000-2020.

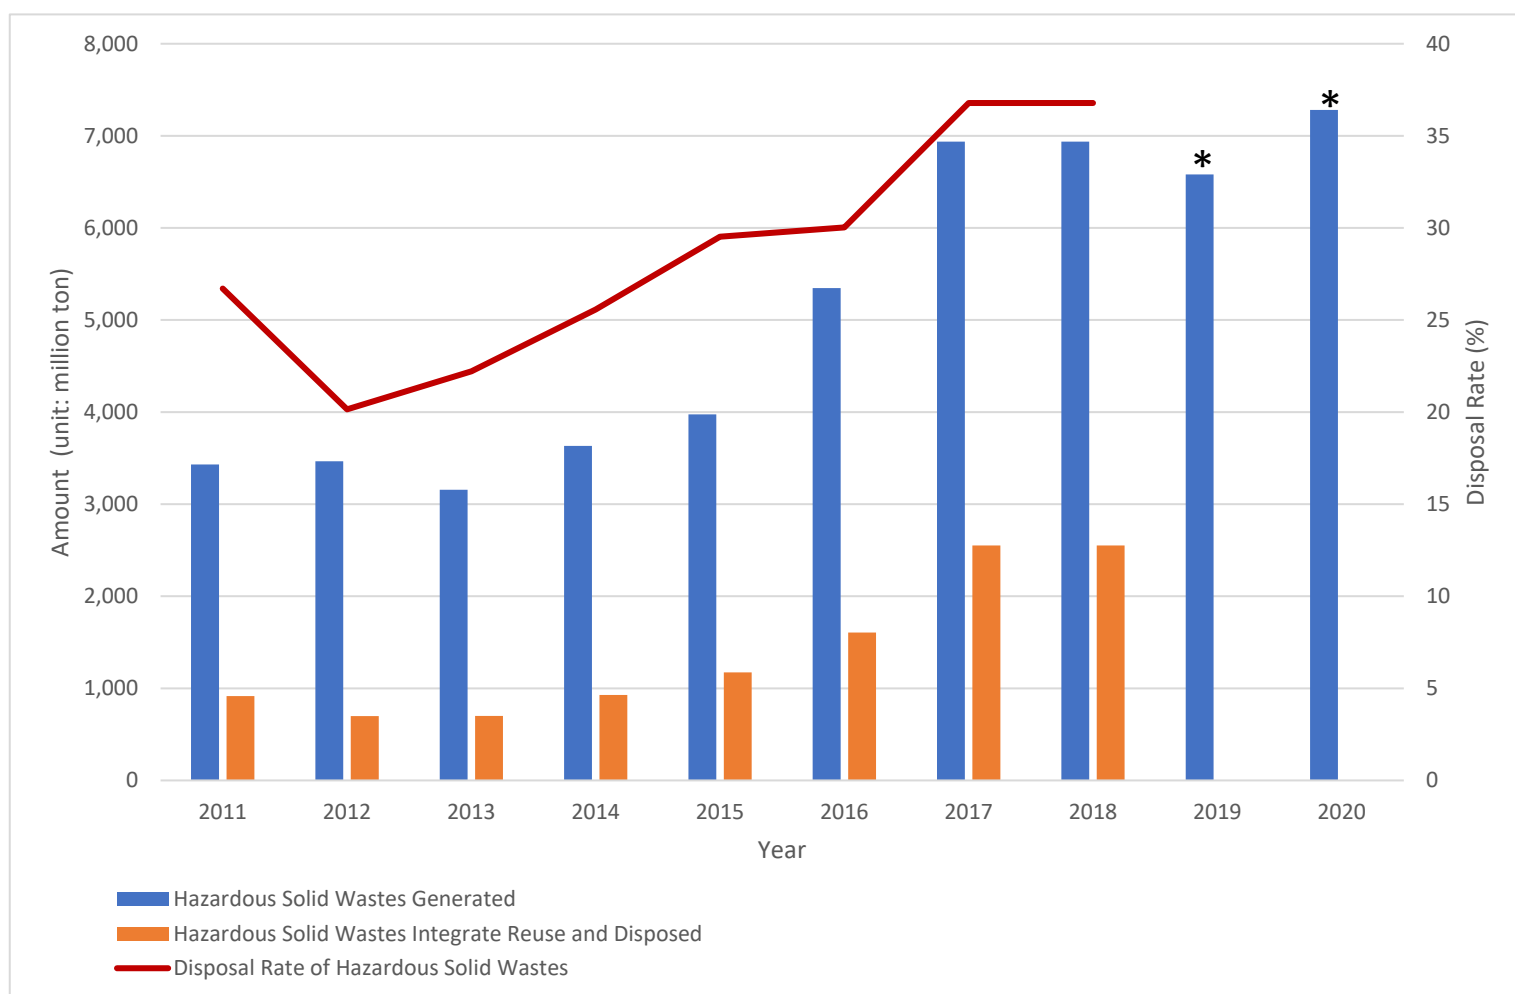

**Figure S2.** Amount of hazardous solid waste generated and disposed of PRC in 2011–2020 and their disposal rate (\* date for total amounts only for 2019, 2020 due to COVID-19).

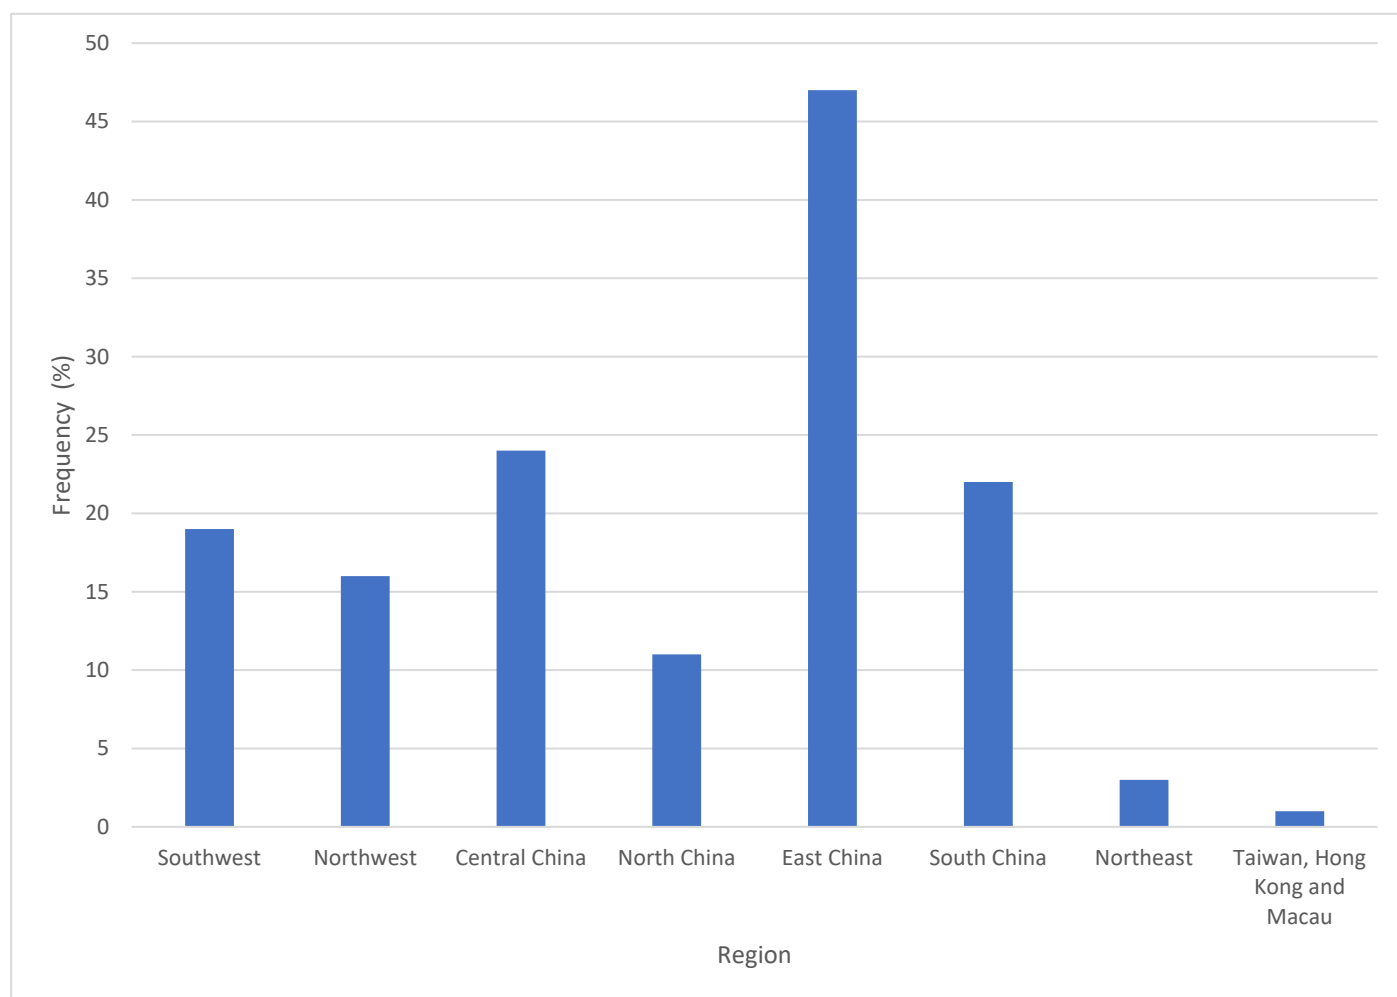

**Figure S3.** Frequency (%) of location for remediation projects carried out by respondents.

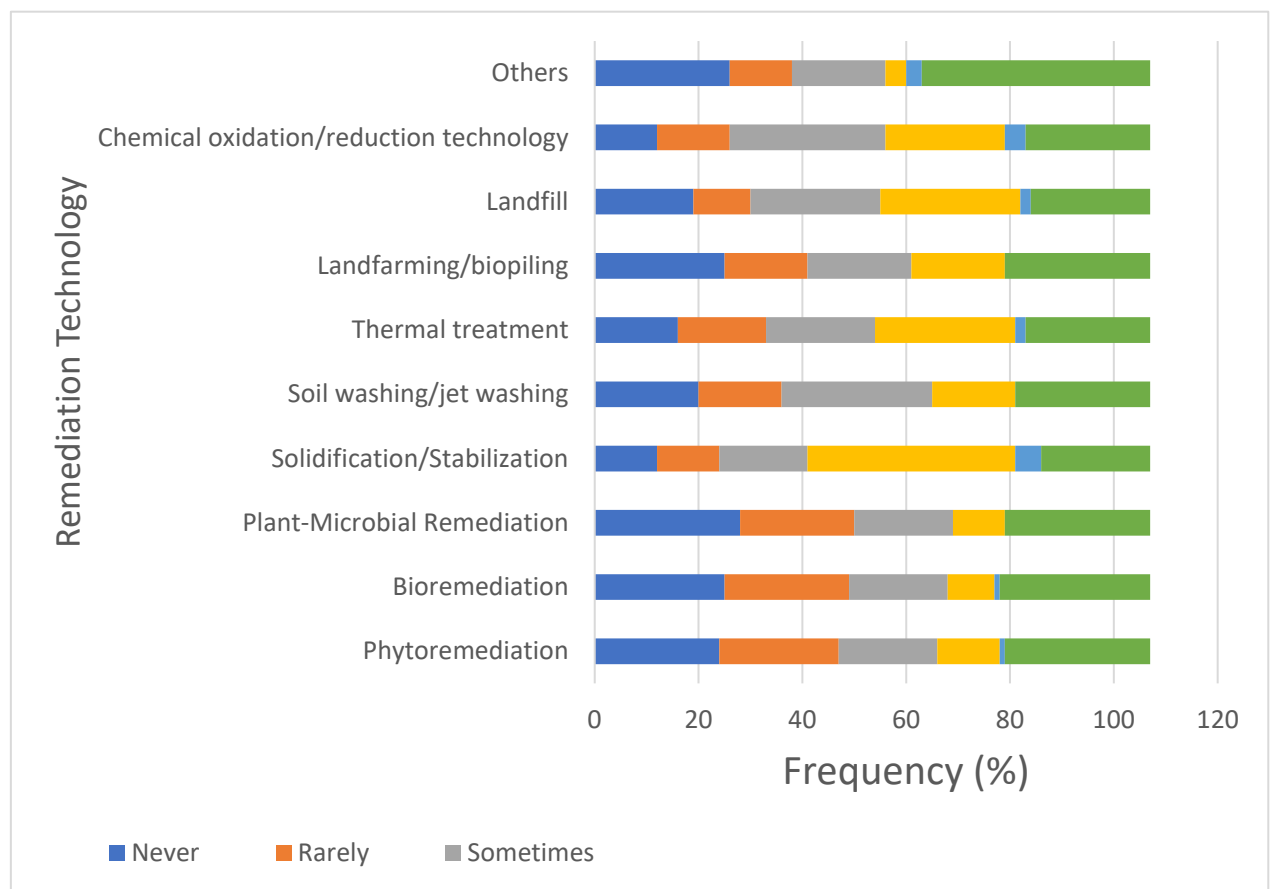

**Figure S4.** Relative frequency of the application of remediation technologies in site development.

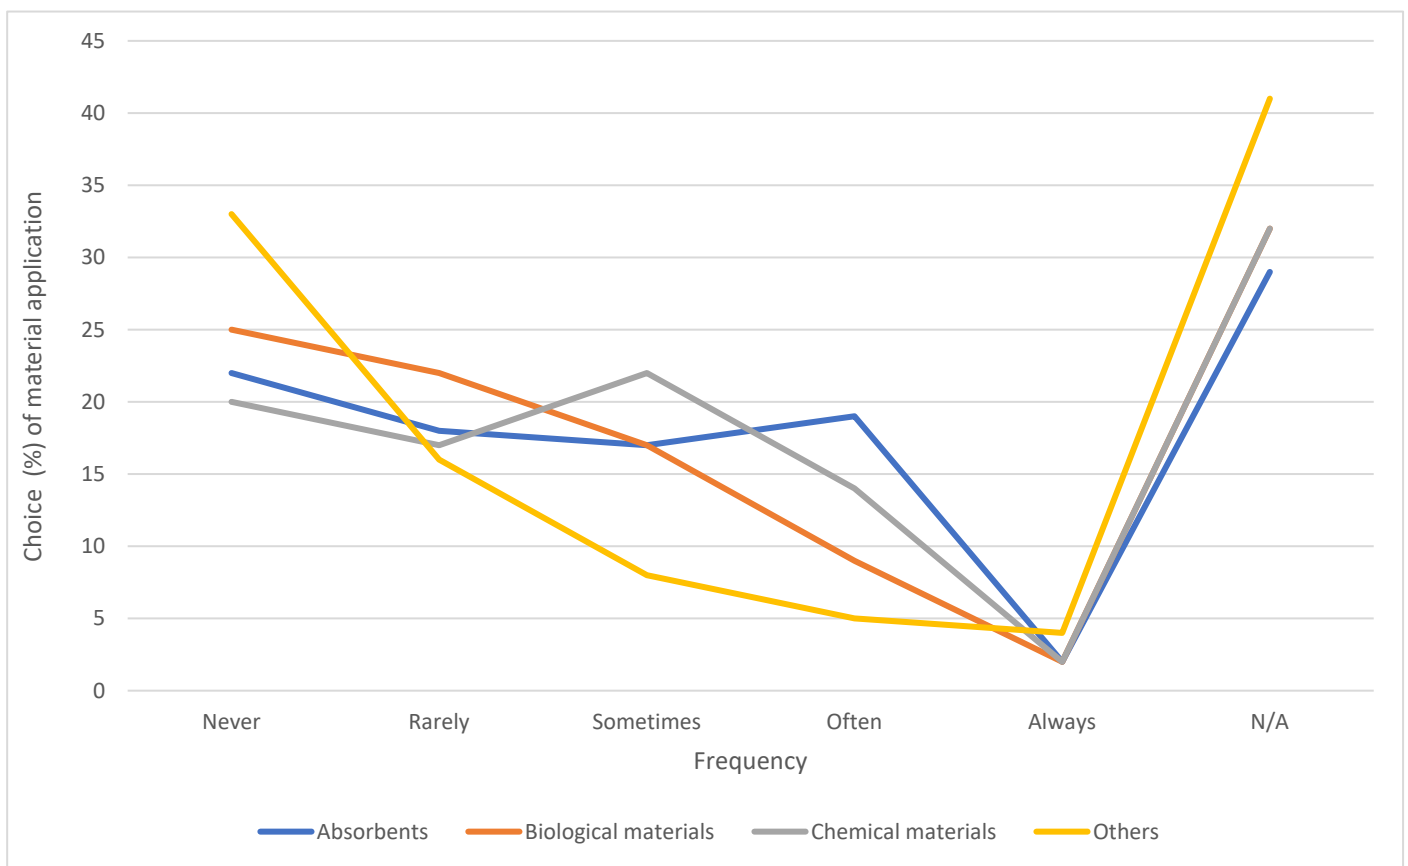

**Figure S5.** Frequency of material application (%) in stabilization or solidification treatment of soil contamination.
